# Supplementary material for: Exploring Correlations between Headaches and Refractive Errors in an Optometry Clinic Sample
Source: PubMed Central journal article supplement (PMC10768566; doi:10.22599/bioj.313), 2024-01-03
Supplement: bioj-20-1-313-s1.pdf [file bioj-20-1-313-s1.pdf]

**Appendix B:** Summary of previous studies on frequency

| Authors                   | Age range (years)  | Sample size | WTR  | ATR | Oblique    | Simple | Compound | Hyperopic | Mixed |
|---------------------------|--------------------|-------------|------|-----|------------|--------|----------|-----------|-------|
| Present study             | 1065               | 1065        |      |     |            |        |          |           |       |
| Thoroud et al (2021)      | 20                 | 20          |      |     |            |        |          |           |       |
| Dotan et al (2014)        | 917                | 917         |      |     |            |        |          |           |       |
| Gil Gouveian et al (2002) | Mean age 37.6      | 105 main    |      |     |            |        |          |           |       |
| Abolbashari et al (2014)  | Mean age 21.02 ± 1 | 74          | 40   | 33  | 62         |        |          |           |       |
| Das & Gupta (2017)        | 10-18              | 238         | 31   | 82  | 26 (Count) |        |          |           |       |
| Singh et al (2021)        | 18-61              | 132         |      |     |            | 22.8   | 0.8      |           |       |
| Supriya &Nakkella (2021)  | 16-45              | 180         | 40.2 | 9.8 | 4.9        | 42     | 9.8      | 4.9       | 45.1  |
| Akinci et al (2008)       | 8-18               | 6-36        |      |     |            | 1.6    | 7.7      |           | 10    |
| Jain et al (2015)         | 6-36               | 1520        |      |     |            | 6.90   | 13.7     | 10.3      | 17.2, |
| Jain et al (2018)         | 16-30              | 103         |      |     |            | 14.5   | 6.5      | 16        | 1     |
| Christopher et al (2021)  | 10-18              | 311         |      |     |            |        |          |           |       |
| Parajuli et al (2021)     | 37.1               | 200         |      |     |            |        |          |           |       |
| Hendricks et al (2007)    | 11-13              | 487         |      |     |            |        |          |           |       |
| Lajmi et al (2021)        | 712                | 50          |      |     |            |        |          |           |       |
| Mahboob et al (2019)      | 5-16               | 16-30       |      |     |            |        |          |           |       |
| Khatabeh et al (2021)     | 5-13               | 712         |      |     |            |        |          |           |       |

### Appendix C: Frequency of headaches types and subtypes

| Variable                       | All n % [95%CI]          | Age Groups  |             |             | $\chi^2(p\text{-value})$ | Sex        |             | $\chi^2(p\text{-value})$ |
|--------------------------------|--------------------------|-------------|-------------|-------------|--------------------------|------------|-------------|--------------------------|
|                                |                          | 10-18       | 19-29       | 30-40       |                          | Male       | Female      |                          |
| TH                             | 584 (58.17)[55.04-61.23] | 150 (25.68) | 216 (36.99) | 218 (37.33) | 6.09 (0.41)              | 98 (16.78) | 486 (83.22) | 17.87(0.005)*            |
| FH                             | 254 (25.30)[22.66-28.13] | 81 (31.89)  | 95 (37.40)  | 78 (30.71)  |                          | 73 (28.74) | 181 (71.26) |                          |
| DH                             | 121 (12.05)[10.14-14.26] | 35 (29.66)  | 38 (32.20)  | 45 (38.14)  |                          | 32 (26.45) | 89 (73.55)  |                          |
| OH                             | 45 (4.48)[3.32-6.0]      | 11 (24.44)  | 18 (40.0)   | 16 (35.56)  |                          | 8 (17.78)  | 37 (82.22)  |                          |
| <b>Combined headache types</b> |                          |             |             |             |                          |            |             |                          |
| TH+FH                          | 93 (46.5)[39.44-53.67]   | 23 (24.73)  | 29 (31.18)  | 41 (44.09)  | 0.229 <sup>α</sup>       | 15 (16.13) | 78 (83.87)  | 0.115 <sup>α</sup>       |
| TH+GH                          | 6 (3.0)[1.11-6.42]       | 1 (16.67)   | 1 (16.67)   | 4 (66.67)   |                          | 2 (33.33)  | 4(66.67)    |                          |
| TH+OH                          | 13 (6.5)[3.51-10.86]     | 1 (7.69)    | 4 (30.77)   | 8 (61.54)   |                          | 1 (7.69)   | 12 (92.31)  |                          |
| TH+FH+GH                       | 2 (1.0)[0.12-3.57]       | 1 (50.0)    | 1 (50.0)    | 0 (0.0)     |                          | 0 (0.0)    | 2 (100.0)   |                          |
| TH+FH+OH                       | 70 (35.0)[28.41-42.05]   | 21 (30.0)   | 30 (42.86)  | 19 (27.14)  |                          | 12 (17.14) | 58 (82.86)  |                          |
| TH+FH+OH+GH                    | 8 (4.0)[1.74-7.73]       | 2 (25.0)    | 4 (50.0)    | 2 (25.0)    |                          | 4 (50.0)   | 4(50.0)     |                          |
| FH+OH                          | 6 (3.0)[1.11-6.42]       | 2 (33.33)   | 3 (50.0)    | 1 (16.67)   |                          | 1 (16.67)  | 5(83.33)    |                          |
